# Supplementary material for: Histological Characteristics and Management of Hepatitis on Immune Checkpoint Inhibitors: A Retrospective Descriptive Study
Source: MDPI journal article supplement (doi:10.3390/jcm12113751), 2023-05-29
Supplement: s1 [file s1]

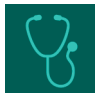

**Table S1.** Raw histological characteristics according to ICI regimen.

| Histological characteristics |         | Population (20) | Anti-PD-1 monotherapy (14) | Anti-PD-1 + anti-CTLA-4 combination therapy (6) | p-value |
|------------------------------|---------|-----------------|----------------------------|-------------------------------------------------|---------|
| Granuloma                    |         | 6 (30)          | 3 (21)                     | 3 (50)                                          | 0.879   |
| Plasma cells                 |         | 2 (10)          | 1 (7)                      | 1 (17)                                          | 0.125   |
| Eosinophils                  |         | 9 (45)          | 6 (43)                     | 3 (50)                                          | 0.814   |
| Steatosis                    |         | 5 (25)          | 4 (28)                     | 1 (17)                                          | 0.708   |
| Fibrosis                     |         | 5 (25)          | 2 (14)                     | 3 (50)                                          | 0.077   |
| Endothelitis                 |         | 6 (30)          | 3 (21)                     | 3 (50)                                          | 0.265   |
| Cholangitis                  |         | 9 (45)          | 5 (36)                     | 4 (67)                                          | 0.509   |
| Ductopenia                   |         | 1 (5)           | 0 (0)                      | 1 (17)                                          | 0.269   |
| Sinusoidal dilatation        |         | 2 (10)          | 1 (7)                      | 1 (17)                                          | 0.939   |
| Necrosis                     | minimal | 10 (50)         | 9 (64)                     | 1 (17)                                          | 0.057   |
|                              | mild    | 2 (10)          | 0 (0)                      | 2 (33)                                          | 0.026   |
|                              | severe  | 7 (35)          | 3 (21)                     | 4 (67)                                          | 0.058   |
| Portal involvement           |         | 19 (95)         | 13 (93)                    | 6 (100)                                         | 0.365   |
| Lobular involvement          |         | 19 (95)         | 13 (93)                    | 6 (100)                                         | 0.365   |
| Tumor involvement            |         | 1 (5)           | 0 (0)                      | 1 (17)                                          | 0.269   |
